# Supplementary material for: Socio-Economic Determinants of Health Literacy in High School Students: A Cross-Sectional Study
Source: MDPI journal article supplement (doi:10.3390/ijerph182212231), 2021-11-21
Supplement: s1 [file s1]

## **Questionnaire's items operationalised in the analysis**

**Gender** ☐ female ☐ male

**Class at school** \_\_\_\_\_ (1, 2, 3 or 4?)

### **Type of the school**

- ☐ lyceum
- ☐ technical vocational school

### **Educational level of mother (legal guardian)**

- ☐ elementary
- ☐ basic vocationally
- ☐ secondary
- ☐ university

### **Educational level of father (legal guardian)**

- ☐ elementary
- ☐ basic vocationally
- ☐ secondary
- ☐ university

### **What is a marital status of your parents**

- ☐ marriage
- ☐ concubine
- ☐ divorced or in separation
- ☐ one of parents died
- ☐ both parents died

### **What is the number of household members?**

how many persons? \_\_\_\_\_

### **Place of residence**

- ☐ urban >400,000 inhabitants
- ☐ urban >200,000 to 400,000 inhabitants
- ☐ urban >100,000 to 200,000 inhabitants
- ☐ urban >10,000 to 100,000 inhabitants
- ☐ urban ≤10,000 inhabitants
- ☐ rural

### **What is the size of your accommodation?**

- ☐ not more than 30 m<sup>2</sup>

- ☐ from 31 m<sup>2</sup> to 50 m<sup>2</sup>
- ☐ from 51 m<sup>2</sup> to 70 m<sup>2</sup>
- ☐ from 71 m<sup>2</sup> to 90 m<sup>2</sup>
- ☐ above 90 m<sup>2</sup>

**How much do you spend monthly on your mobile phone?**

- ☐ below 5 zł
- ☐ from 5 to below 10 zł
- ☐ from 10 to below 30 zł
- ☐ from 30 to below 50 zł
- ☐ at least 50 zł
- ☐ I have not got a mobile phone

**Does your household receive external help? What is the form of such help?**

- ☐ financial
- ☐ material
- ☐ in the form of services
- ☐ no external help

**How do you assess economic situation of your family**

- ☐ very good
- ☐ good
- ☐ average
- ☐ bad
- ☐ very bad

**How many books, not including school manual and e-books, are there at your home?**

- ☐ no books
- ☐ not more than 25
- ☐ 26 – 50
- ☐ 51 – 100
- ☐ 101 – 500
- ☐ more than 500

**How many hours per week do you use the Internet?**

- ☐ ≤2 hours
- ☐ 3 - 7 hours
- ☐ 8 - 14 hours
- ☐ 15 - 21 hours
- ☐ 22- 35 hours

**18. Jakie jest źródło utrzymania rodziny?**

**(zaznacz wszystkie możliwe)**

- ☐ pracują obydwój rodzice (opiekunowie)
- ☐ pracuje jeden z rodziców (opiekunów), kto z rodziców? \_\_\_\_\_
- ☐ obydwój rodzice (opiekunowie) są bezrobotni
- ☐ renta/emerytura, kto z rodziców? \_\_\_\_\_
- ☐ prowadzenie gospodarstwa rolnego
- ☐ prowadzenie działalności gospodarczej
- ☐ praca dorywcza, kto z rodziców? \_\_\_\_\_
- ☐ praca za granicą, kto z rodziców? \_\_\_\_\_

**19. Czy gospodarstwo domowe korzysta z pomocy z zewnątrz? Jaka jest jej forma? (np. od pomocy społecznej, zasiłki dla bezrobotnych itd.)**

- ☐ finansowa
- ☐ rzeczowa
- ☐ w formie usług
- ☐ gospodarstwo domowe nie uzyskuje pomocy z zewnątrz

**20. Jak oceniasz sytuację materialną/finansową w rodzinie?**

- ☐ bardzo dobra
- ☐ dobra
- ☐ średnia
- ☐ zła
- ☐ bardzo zła

**21. Jakie dobra są w posiadaniu Twojej rodziny?**

**(zaznacz wszystkie możliwe)**

- ☐ samochód osobowy, osobowo-dostawczy, ile? \_\_\_\_\_
- ☐ iPad lub inny tablet, ile? \_\_\_\_\_
- ☐ komputer stacjonarny, laptop, notebooki, ile? \_\_\_\_\_
- ☐ dostęp do Internetu w domu
- ☐ telewizja kablowa / satelitarna
- ☐ telefon komórkowy, ile? \_\_\_\_\_

**22. Jakie urządzenia elektroniczne posiadasz na własny użytek? (zaznacz wszystkie możliwe)**

- ☐ telefon komórkowy
- ☐ iPad lub inny tablet
- ☐ komputer stacjonarny, laptop, notebook
- ☐ telewizor

- ☐ elektroniczny czytnik książek (e-book)

**23. Jaka kwotę przeznaczasz miesięcznie na własny telefon komórkowy?**

- ☐ do 5 zł
- ☐ 5 – 10 zł
- ☐ 10 – 30 zł
- ☐ 30 – 50 zł
- ☐ powyżej 50 zł
- ☐ nie posiadam telefonu komórkowego

**24. Ile książek (bez podręczników szkolnych i e-booków) jest w Twoim domu?**

- ☐ brak zbiorów książek
- ☐ do 25 sztuk
- ☐ 26 – 50 sztuk
- ☐ 51 – 100 sztuk
- ☐ 101 – 500 sztuk
- ☐ ponad 500 sztuk
  - ☐ powyżej 36 godzin
